# Supplementary material for: Alternating current properties of bulk- and nanosheet-graphitic carbon nitride compacts at elevated temperatures
Source: Royal Society of Chemistry journal article supplement (doi:10.1039/d3ra04520j), 2023-01-01
Supplement: d3ra04520j1.pdf [file d3ra04520j1.pdf]

*Electronic Supplementary Information*

**Alternating current properties of bulk- and nanosheet-graphitic carbon nitride  
compacts at elevated temperatures**

Tosapol Maluangnont,<sup>a\*</sup> Phieraya Pulphol,<sup>b</sup> Kanokwan Chaithawee,<sup>c</sup>

Klichchupong Dabsamut,<sup>d</sup> Thawanrat Kobkeatthawin,<sup>e</sup> Siwaporn Meejoo Smith,<sup>e</sup>

Adisak Boonchun,<sup>d</sup> and Naratip Vittayakorn<sup>c</sup>

<sup>a</sup> Electroceramics Research Laboratory, College of Materials Innovation and Technology,  
King Mongkut's Institute of Technology Ladkrabang, Bangkok 10520, Thailand

<sup>b</sup> Department of Materials Science, Faculty of Science, Srinakharinwirot University, Bangkok  
10110, Thailand

<sup>c</sup> Advanced Materials Research Unit and Department of Chemistry, School of Science, King  
Mongkut's Institute of Technology Ladkrabang, Bangkok 10520, Thailand

<sup>d</sup> Department of Physics, Faculty of Science, Kasetsart University, Bangkok 10900, Thailand

<sup>e</sup> Center of Sustainable Energy and Green Materials and Department of Chemistry, Faculty of  
Science, Mahidol University, Nakhon Pathom 73170, Thailand

\*corresponding author email: [tosapol.ma@kmitl.ac.th](mailto:tosapol.ma@kmitl.ac.th)

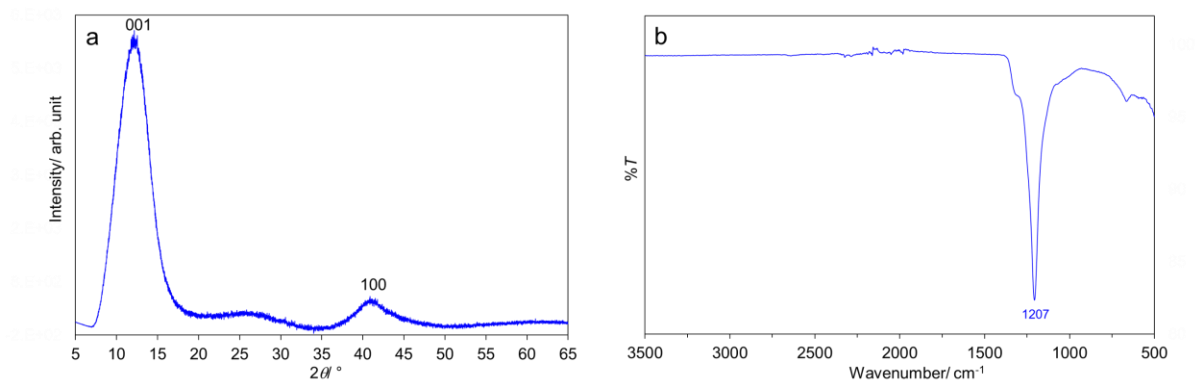

Figure S1 (a) XRD pattern, and (b) FTIR spectrum of graphite fluoride.

The XRD pattern in Figure S1a shows two broad peaks at  $2\theta = 12.3^\circ$  ( $d = 7.2 \text{ \AA}$ , *i.e.*, the interlayer distance), and  $2\theta = 40.7^\circ$  ( $d = 2.2 \text{ \AA}$ ). These peaks are assigned as the 001 and 100 reflections, respectively, typical for graphite fluoride which has a turbostratic structure.<sup>1</sup> Figure S1b is the IR spectrum, showing strong peak at  $1207 \text{ cm}^{-1}$  typical of the C-F stretching.<sup>2</sup>

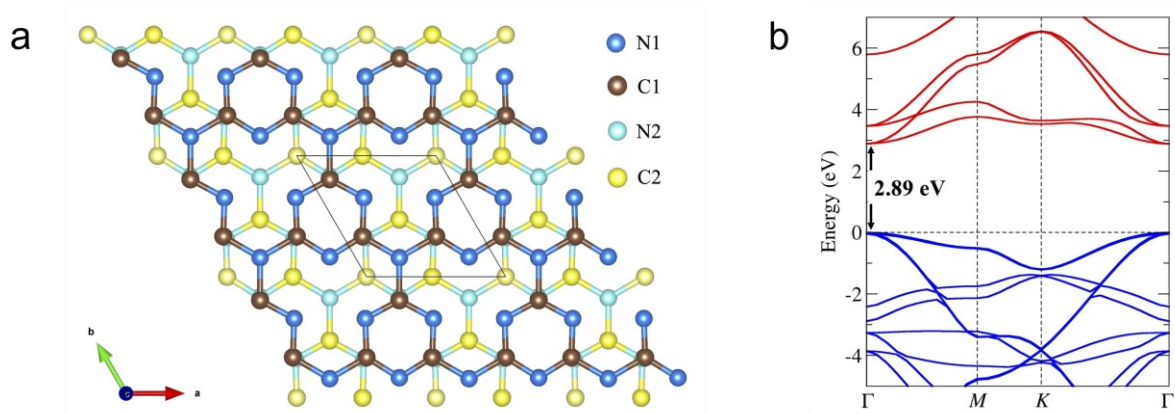

Figure S2 (a) Crystal structure on the  $ab$  plane, and (b) electronic band structure of bulk-g-C<sub>3</sub>N<sub>4</sub>. Blue and brown balls are nitrogen (N1) and carbon (C1) at the top layer, while light blue and yellow balls represent nitrogen (N2) and carbon (C2) at the bottom layer.

We employed the *s*-triazine-based unit as the structure of bulk-g-C<sub>3</sub>N<sub>4</sub> as shown in Figure S2a, with the layers stacked in the A-B fashion.<sup>3</sup> The calculated lattice constants of bulk-g-C<sub>3</sub>N<sub>4</sub> are  $a = b = 4.741 \text{ \AA}$ ,  $c = 6.626 \text{ \AA}$  consistent with the reported values.<sup>3</sup> Figure S2b presents the electronic band structure of bulk-g-C<sub>3</sub>N<sub>4</sub> obtained using the HSE06 functional. It is found that bulk-g-C<sub>3</sub>N<sub>4</sub> exhibited a direct bandgap semiconductor behavior, with an energy gap of 2.89 eV. This is close to the reported values of 2.73 and 2.88 eV calculated by the same functional.<sup>3</sup>

Table S1 Comparison of CTE obtained in this work vs those of related materials reported in the literature.<sup>a</sup>

| Sample                                    | $\alpha/ \text{K}^{-1}$                 | Method <sup>b</sup> | $T$ range/ $^{\circ}\text{C}$ | Ref.                          |
|-------------------------------------------|-----------------------------------------|---------------------|-------------------------------|-------------------------------|
| Bulk-g-C <sub>3</sub> N <sub>4</sub>      | $3.1 \times 10^{-5}/2.5 \times 10^{-5}$ | vT-XRD              | 25-350                        | This work                     |
| Nanosheet-g-C <sub>3</sub> N <sub>4</sub> | $2.2 \times 10^{-5}/2.4 \times 10^{-5}$ | vT-XRD              | 25-350                        | This work                     |
| Bulk-g-C <sub>3</sub> N <sub>4</sub>      | $1 \times 10^{-5}-2.5 \times 10^{-5}$   | DFT calculation     | 25-400                        | Sun et al <sup>4</sup>        |
| Amorphous carbon nitride                  | $2 \times 10^{-6}-9 \times 10^{-6}$     | TIB                 | NA                            | Champi et al <sup>5</sup>     |
| Natural graphite sheet                    | $3.3 \times 10^{-5}$                    | TMA                 | 30-100                        | Cermak et al <sup>6</sup>     |
| hBN                                       | $3.77 \times 10^{-5}$                   | vT-XRD              | 24.5                          | Paszkowicz et al <sup>7</sup> |

<sup>a</sup>values in this work listed as heating/cooling

<sup>b</sup>vt-XRD: variable-temperature XRD

TMA: thermomechanical analysis

TIB: thermally induced bending

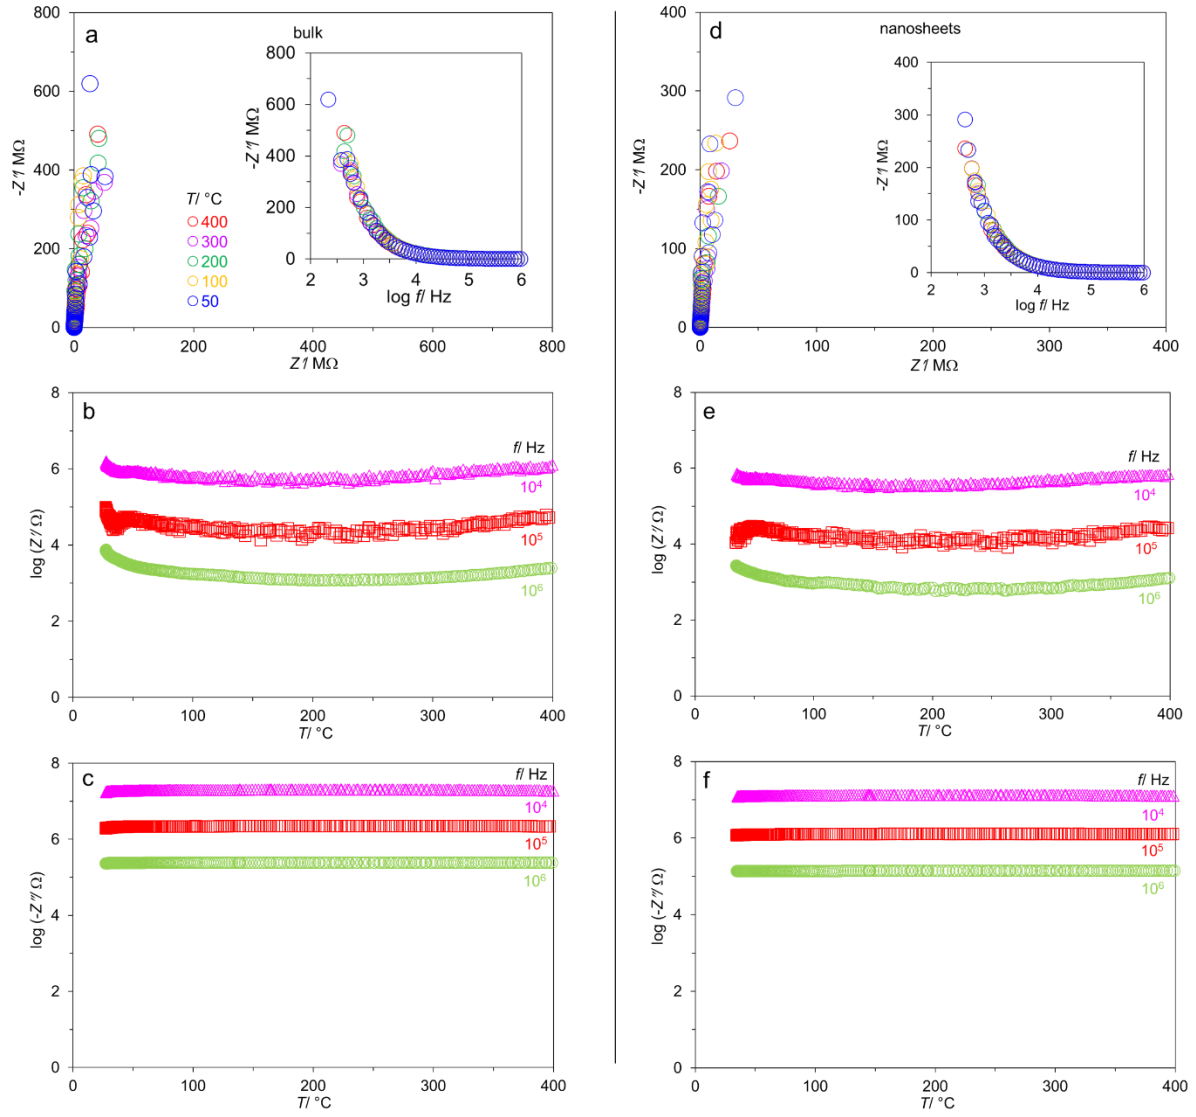

Figure S3 (a,d) Nyquist plots measured at different temperatures; and the temperature dependence of (b,e)  $\log Z'$ , and (c,f)  $\log -Z''$  at selected frequencies. Panel (a-c) for bulk-g-C<sub>3</sub>N<sub>4</sub>, while panel (d-f) for nanosheet-g-C<sub>3</sub>N<sub>4</sub>. Data were obtained in the cooling process.

The Nyquist plots of both samples appeared almost as the straight lines from 400→50 °C, indicating their highly insulating nature consistent with the literature.<sup>8</sup> This is also evident from the flat  $T$ -dependence of  $\log Z$  and  $\log -Z''$  in Figure S1b,c,e, and f. The spectroscopic plots in the inset (i.e.,  $-Z''$  vs  $\log f$ ) are also featureless. Apparently, it is not possible to extract more information from the  $f$ -scanning results.

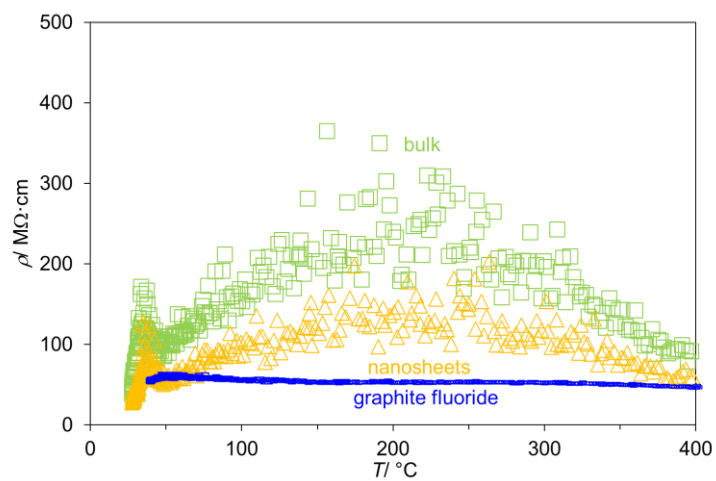

Figure S4 Variation of resistivity  $\rho$  (in  $\text{M}\Omega\cdot\text{cm}$ ) of the bulk- and nanosheet- $\text{g-C}_3\text{N}_4$  in comparison to graphite fluoride. Data shown here were at  $10^5$  Hz and were obtained in the cooling process.

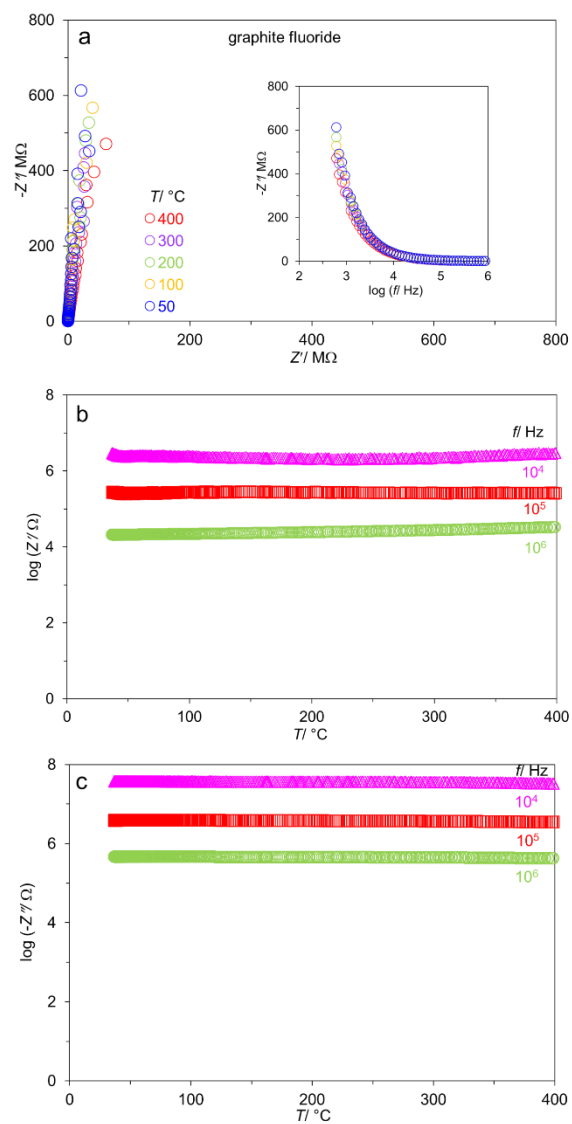

Figure S5 (a) Nyquist plots of graphite fluoride measured at different temperatures; and the temperature dependence of (b)  $\log Z'$ , and (c)  $\log -Z''$  at selected frequencies. Data were obtained in the cooling process.

### Calculation of AC properties

The complex impedance  $Z^*$  is described by:

$$Z^* = Z' + iZ'' \quad (S1)$$

with  $Z'$  and  $Z''$  as the real and imaginary part of the function, respectively. The resistivity  $\rho$  ( $\Omega \cdot \text{cm}$ ) can be calculated from  $Z^*$ :

$$\rho = 1/\sigma \quad (S2)$$

$$\sigma = (t/A) \cdot [Z'/(Z'^2 + Z''^2)] \quad (S3)$$

where  $\sigma$  is the conductivity ( $\text{S} \cdot \text{cm}^{-1}$ ),  $t$  is the thickness of the pellet in cm (i.e., the distance between electrodes in cm), and  $A$  is the area of the pellet in  $\text{cm}^2$ .

The complex dielectric permittivity  $\varepsilon^*$  [eq(S4)] was calculated using eqs (S5-S7):

$$\varepsilon^* = \varepsilon' + i\varepsilon'' \quad (S4)$$

$$\varepsilon' = (t/\omega A \varepsilon_0) \cdot [Z''/(Z'^2 + Z''^2)] \quad (S5)$$

$$\varepsilon'' = (t/\omega A \varepsilon_0) \cdot [Z'/(Z'^2 + Z''^2)] \quad (S6)$$

$$\tan \delta = \varepsilon''/\varepsilon' \quad (S7)$$

with  $\varepsilon'$  and  $\varepsilon''$  as the real- and imaginary part of the complex dielectric function;  $\omega = 2\pi f$ ;  $\varepsilon_0$  is the vacuum permittivity ( $8.854 \times 10^{-12} \text{ F} \cdot \text{m}^{-1}$ ); and  $\tan \delta$  is the loss tangent.

The refractive index<sup>9, 10</sup>  $n$ , dielectric heating coefficient<sup>9, 11</sup>  $J$ , and attenuation coefficient<sup>12-14</sup>  $\alpha$  were calculated using eq(S8), (S9), and (S10), respectively (where  $c$  is the speed of light):

$$n^2 = [(\varepsilon'^2 + \varepsilon''^2)^{1/2} + \varepsilon']/2 \quad (S8)$$

$$J = 1/(\varepsilon' \cdot \tan \delta) \quad (S9)$$

$$\alpha = \frac{2\pi f}{\sqrt{2}c} \sqrt{-\varepsilon' + \sqrt{(\varepsilon')^2 + \varepsilon''^2}} \quad (S10)$$

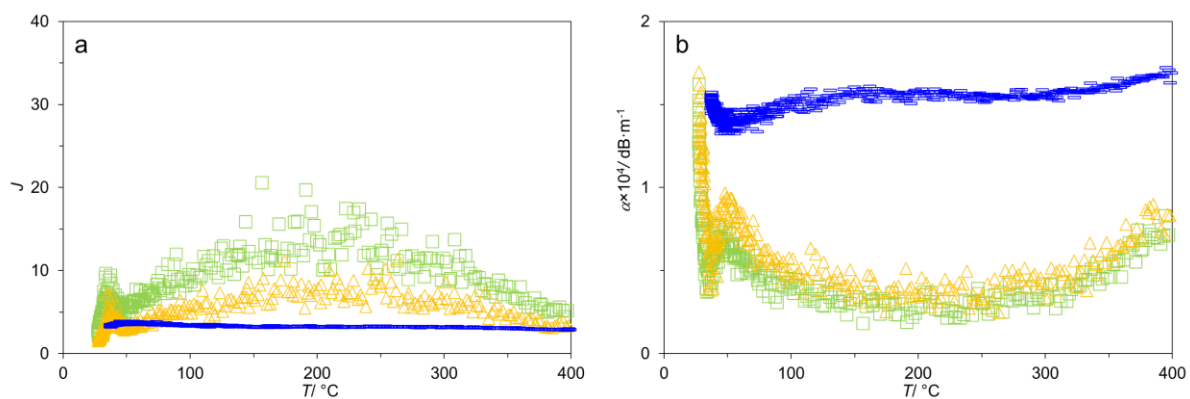

Figure S6 Temperature dependence of (a) dielectric heating coefficient  $J$ , and (b) attenuation coefficient  $\alpha \times 10^4$ , for bulk and nanosheets samples of g-C<sub>3</sub>N<sub>4</sub>, in comparison to graphite fluoride. Data shown here were at  $10^5$  Hz and were obtained in the cooling process.

To provide more examples on the  $T$ -dependence of electrical properties in g-C<sub>3</sub>N<sub>4</sub>, we calculated the dielectric heating coefficient  $J$  [eq(S9)] and the attenuation coefficient  $\alpha$  [eq(S10)]. As shown in Figure S6a at  $f = 10^5$  Hz,  $J$  of graphite fluoride is low (3.2) and relatively constant from 400 to 50 °C. On the other hand, the  $J$  values of g-C<sub>3</sub>N<sub>4</sub> samples are larger (averaged 7.7-13.1) and more scatter with  $T$ . For comparison, at  $10^5$  Hz and RT,  $J$  of the cellulose film<sup>9</sup> is  $\sim 30$ .

Figure S6b shows the  $T$ -dependence of  $\alpha$  at  $10^5$  Hz ( $\alpha$  is the ability of a material to suppress electromagnetic waves). The  $\alpha$  values are relatively constant for graphite fluoride ( $1.5 \times 10^{-4}$ ) compared to those with larger  $T$ -variations for g-C<sub>3</sub>N<sub>4</sub> samples ( $2.8 \times 10^{-5}$ ). For comparison,  $\alpha$  of ceramics such as layered titanate is on the order of  $10^{-3}$ .<sup>12</sup>

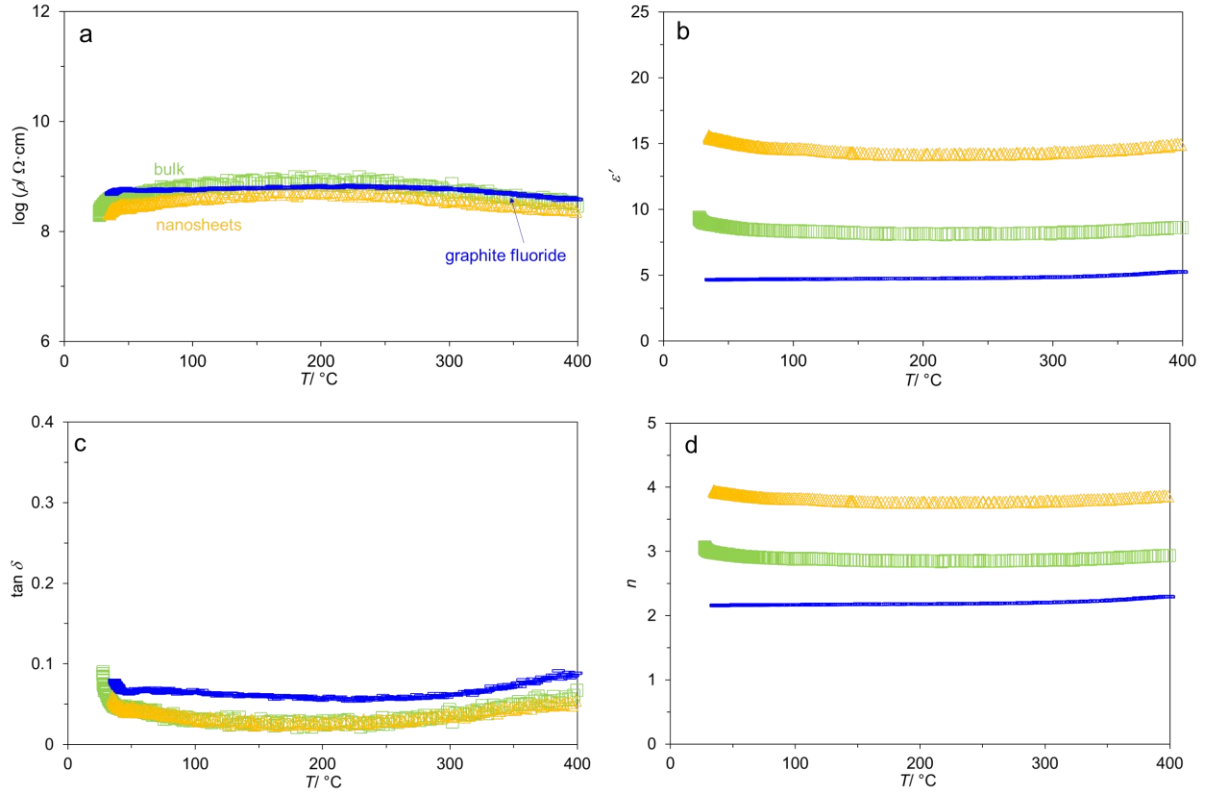

Figure S7 Temperature dependence of (a)  $\log \rho$ , (b)  $\epsilon'$ , (c)  $\tan \delta$ , and (d)  $n$  for bulk and nanosheets samples of g-C<sub>3</sub>N<sub>4</sub>, in comparison to graphite fluoride. Data shown here were at  $10^4$  Hz and were obtained in the cooling process.

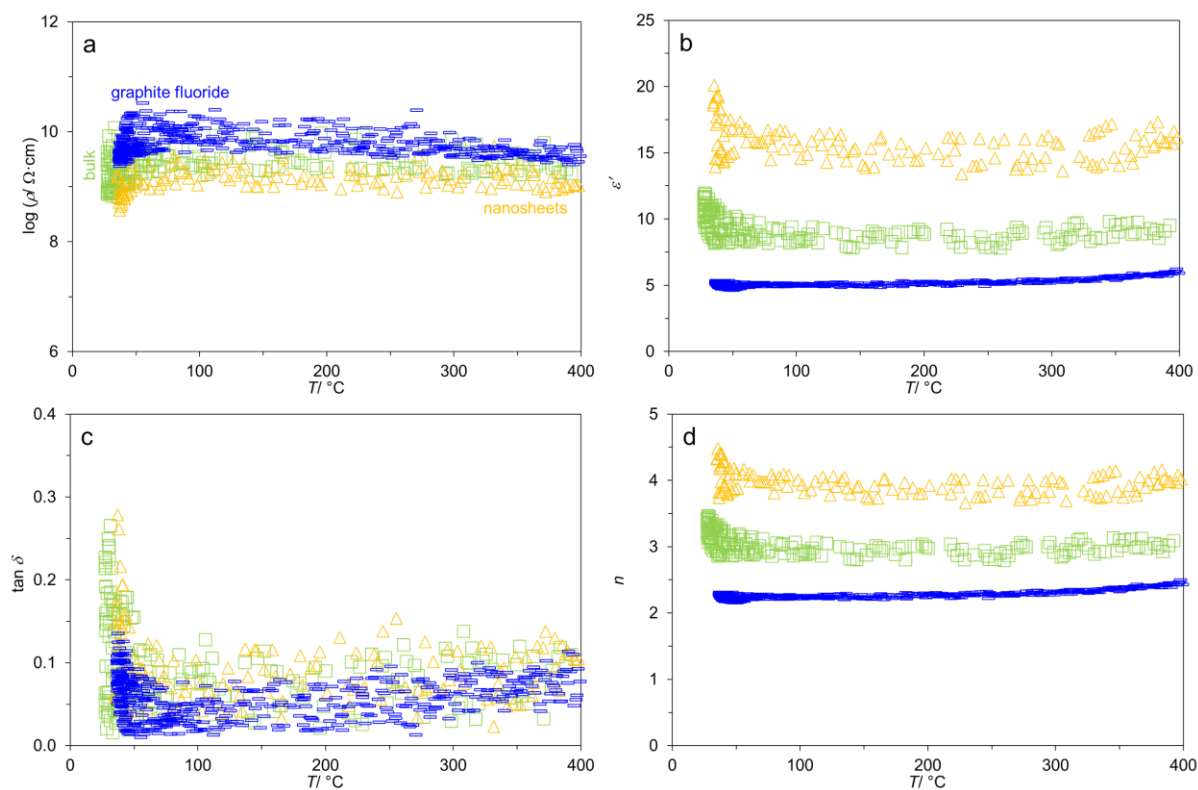

Figure S8 Temperature dependence of (a)  $\log \rho$ , (b)  $\epsilon'$ , (c)  $\tan \delta$ , and (d)  $n$  for bulk and nanosheets samples of g-C<sub>3</sub>N<sub>4</sub>, in comparison to graphite fluoride. Data shown here were at  $10^3$  Hz and were obtained in the cooling process.

The data at  $10^3$  Hz are noisy compared to those at  $10^4$  and  $10^5$  Hz. Presumably, at low frequency the charge conduction is so small and almost reach the instrument limit. (Yet, it is apparent that the average values are consistent with those reported in Table 2 in the manuscript.) The data at  $10^2$  Hz were also collected, scattering heavily, presumably due to the contribution from electrode polarization typically observed at low-frequency. These are not reported here.

## Supplementary references

- (1) Kita, Y.; Watanabe, N.; Fujii, Y. Chemical composition and crystal structure of graphite fluoride. *J. Am. Chem. Soc.* **1979**, *101*, 3832-3841.
- (2) Kang, W.; Li, S. Preparation of fluorinated graphene to study its gas sensitivity. *RSC Adv.* **2018**, *8*, 23459-23467.
- (3) Zhu, B.; Cheng, B.; Zhang, L.; Yu, J. Review on DFT calculation of s-triazine-based carbon nitride. *Carbon Energy* **2019**, *1*, 32-56.
- (4) Sun, S. P.; Gu, S.; Sun, J. H.; Xia, F. F.; Chen, G. H. First principles investigation of the electronic properties of graphitic carbon nitride with different building block and sheet staggered arrangement. *J. Alloys Compd.* **2018**, *735*, 131-139.
- (5) Champi, A.; Lacerda, R. G.; Marques, F. C. Thermal expansion coefficient of amorphous carbon nitride thin films deposited by glow discharge. *Thin Solid Films* **2002**, *420-421*, 200-204.
- (6) Cermak, M.; Perez, N.; Collins, M.; Bahrami, M. Material properties and structure of natural graphite sheet. *Sci. Rep.* **2020**, *10*, 18672.
- (7) Paszkowicz, W.; Pelka, J. B.; Knapp, M.; Szyszko, T.; Podsiadlo, S. Lattice parameters and anisotropic thermal expansion of hexagonal boron nitride in the 10–297.5 K temperature range. *Appl. Phys. A* **2002**, *75*, 431-435.
- (8) Maluangnont, T.; Pulphol, P.; Pongampai, S.; Kobkeatthawin, T.; Smith, S. M.; Vittayakorn, N. TiO<sub>2</sub>/graphitic carbon nitride nanosheet composite with enhanced sensitivity to atmospheric water. *RSC Adv.* **2023**, *13*, 6143-6152.
- (9) Maluangnont, T.; Sriphan, S.; Charoonsuk, T.; Vittayakorn, N. Dielectric spectroscopy and electric modulus analyses of Ti<sub>0.8</sub>O<sub>2</sub> nanosheets–Ag nanoparticles–cellulose filter paper composites. *Integr. Ferroelectr.* **2022**, *224*, 214-224.
- (10) Andoulsi-Fezei, R.; Sdiri, N.; Horchani-Naifer, K.; Férid, M. Effect of temperature on the electrical properties of lanthanum ferrite. *Spectrochim. Acta A* **2018**, *205*, 214-220.
- (11) Anju, V. P.; Manoj, M.; Mohanan, P.; Narayanankutty, S. K. A comparative study on electromagnetic interference shielding effectiveness of carbon nanofiber and nanofibrillated cellulose composites *Syn. Met.* **2019**, *247*, 285-297.
- (12) Sriphan, S.; Pulphol, P.; Charoonsuk, T.; Maluangnont, T.; Vittayakorn, N. Effect of adsorbed water and temperature on the universal power law behavior of lepidocrocite-type alkali titanate ceramics. *J. Phys. Chem. C* **2021**, *125*, 12910–12920.
- (13) Kułacz, K.; Orzechowski, K. Nontronite and intercalated nontronite as effective and cheap absorbers of electromagnetic radiation. *Dalton Trans.* **2019**, *48*, 3874-3882.
- (14) Chung, D. D. L. Materials for electromagnetic interference shielding. *J. Mater. Eng. Perform.* **2000**, *9*, 350-354.
